# Supplementary material
Source: Springer Nature journal article supplement (https://www.springermedizin.de/resource/supplementary/12885_2007_1133_MOESM4_ESM.pdf/9471192)
Supplement: MOESM4 [file 9471192]

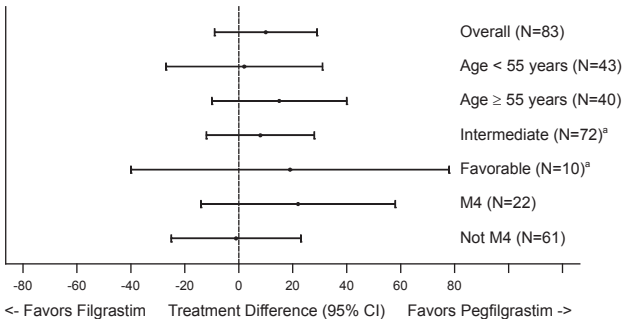

Difference calculated by subtracting the Filgrastim proportion from the Pegfilgrastim proportion

<sup>a</sup>One patient had unfavorable cytogenetics
